# Supplementary material for: BTF3 confers oncogenic activity in prostate cancer through transcriptional upregulation of Replication Factor C
Source: PubMed Central journal article supplement (PMC7791038; doi:10.1038/s41419-020-03348-2), 2021-01-05
Supplement: 41419_2020_3348_MOESM7_ESM.pdf [file 41419_2020_3348_MOESM7_ESM.pdf]

**Supplementary Figure 1. The effects of shRNA-induced BTF3 knockdown on the growth of prostate cancer cells.** **a** qRT-PCR analysis of the *BTF3* mRNA levels was conducted in PC-3 and DU145 cells with or without BTF3-knockdown. *ACTB* was used as an endogenous control. **b** Western blot analysis of BTF3a and BTF3b protein abundance in BTF3-knockdown PC-3 and DU145 cells. Vinculin was used as a loading control. The quantification of protein abundance is shown. **c** The clonogenic formation assay for cells as in **(a)**. Representative images and quantification of the plates are shown. **d** Prostate cancer cells as in **(a)** were cultured in 3D Matrigel. Representative images and the quantitation of 3D spheroids areas are shown. Scale bar, 100  $\mu\text{m}$ . **e** Flow cytometric analysis of Annexin V/PI (propidium iodide) stained BTF3-knockdown PC-3 and DU145 cells was conducted to evaluate apoptosis. **f** The cell migration potential of PC-3 and DU145 with or without BTF3-knockdown was determined using wound-healing assay. Representative images and quantification of the wound areas are shown. Scale bar, 200  $\mu\text{m}$ . **g** The cell invasion potential of PC-3 and DU145 cells with or without BTF3-knockdown was analyzed using Transwell invasion assay. Representative images and quantification of invading cells are shown. Scale bar, 200  $\mu\text{m}$ . Data are shown as mean  $\pm$  S.D. for three independent experiments (\*\*  $p < 0.01$ , \*\*\*  $p < 0.001$ , \*\*\*\*  $p < 0.0001$  by student's *t*-test).

**Supplementary Figure 2. The effects of doxycycline-induced shRNA-mediated BTF3 knockdown on the growth of prostate cancer cells.** **a** qRT-PCR analysis of the *BTF3* mRNA levels was conducted in DU145-Tet-On-shBTF3 or control cells treated with or without doxycycline. *ACTB* was used as an endogenous control. **b**

Western blot analysis of BTF3a and BTF3b protein abundance in DU145-Tet-On-shBTF3 or control cells treated with or without doxycycline. Vinculin was used as a loading control. The quantification of protein abundance is shown. **c** The clonogenic formation assay for cells as in **(a)** treated with or without doxycycline. Representative images and quantification of the plates are shown. **d** DU145-Tet-On-shBTF3 cells were cultured in 3D Matrigel and treated with or without doxycycline. Representative images and the quantitation of 3D spheroids areas are shown. Scale bar, 100  $\mu\text{m}$ . Dox, doxycycline, 0.5  $\mu\text{g/ml}$ . Data are shown as mean  $\pm$  S.D. for three independent experiments (n.s., not significant, \*\*\*\*  $p < 0.0001$  by student's *t*-test).

**Supplementary Figure 3. The effects of siRNA-induced BTF3 knockdown on the growth of prostate cancer cells.** **a** qRT-PCR analysis of the *BTF3* mRNA levels was conducted in PC-3 cells transfected with siNC (Non-targeting Control) or siBTF3. *ACTB* was used as an endogenous control. **b** Western blot analysis of BTF3a and BTF3b protein abundance in PC-3 cells transfected with siNC or siBTF3. Vinculin was used as a loading control. The quantification of protein abundance is shown. **c** Relative cell growth of cells as in **(a)**. **d** The clonogenic formation assay for cells as in **(a)**. Representative images and quantification of the plates are shown. Data are shown as mean  $\pm$  S.D. for three independent experiments (\*\*  $p < 0.01$ , \*\*\*\*  $p < 0.0001$  by student's *t*-test).

**Supplementary Figure 4. Knockdown of BTF3 resulted in significantly decreased expression of RFC genes in prostate cancer cells.** The expression levels of *RFC* genes were determined by RNA sequencing.  $\text{Log}_2(\text{Fold Change (siBTF3 versus siNC)})$  and adjusted *p* values are shown.

**Supplementary Figure 5. Overexpression of BTF3a in prostate cancer cells does not affect the expression of RFC genes.** **a** Western blot analysis of BTF3 protein abundance in DU145 and PC-3 cells with or without overexpression of BTF3a or C terminal V5-tagged BTF3b. Vinculin was used as a loading control. Note: in this experiment, the LI-COR Odyssey Imaging System was used for the near infrared fluorescent detection of the BTF3 antibody (rabbit host) and the V5 tag antibody (mouse host) simultaneously. **b** qRT-PCR analysis of the *RFCs* mRNA levels was conducted in DU145 and PC-3 cells with or without ectopic overexpression of BTF3a. *ACTB* was used as an endogenous control. Data are shown as mean  $\pm$  S.D. for three independent experiments (n.s., not significant by student's *t*-test).

**Supplementary Figure 6. The effect of BTF3 gene expression on cisplatin sensitivity in prostate cancer cells.** **a** Cell viability assay of siRNA-mediated BTF3 knockdown in DU145 or control cells treated with or without cisplatin. **b** Cell viability assay of BTF3a-overexpressing DU145 or control cells treated with or without cisplatin. **c-d** The effect of BTF3b or BTF3a on the response of PC-3 cells to cisplatin. **e** The effect of RFC3 silencing on the response of BTF3b-overexpressing DU145 cells to

cisplatin. Cells were exposed to cisplatin for 2 hours and then subjected to fresh media for 3 days before MTT assay. Data are shown as mean  $\pm$  S.D. for three independent experiments (\*  $p < 0.05$ , \*\*  $p < 0.01$ ; n.s., not significant by student's *t*-test).
